# Supplementary figures and images for: The effect of in vitro gastrointestinal digestion on the phenolic profiles, bioactivities and bioaccessibility of Rhodiola
Source: Royal Society of Chemistry journal article supplement (doi:10.1039/d2fo00469k), 2022-01-01

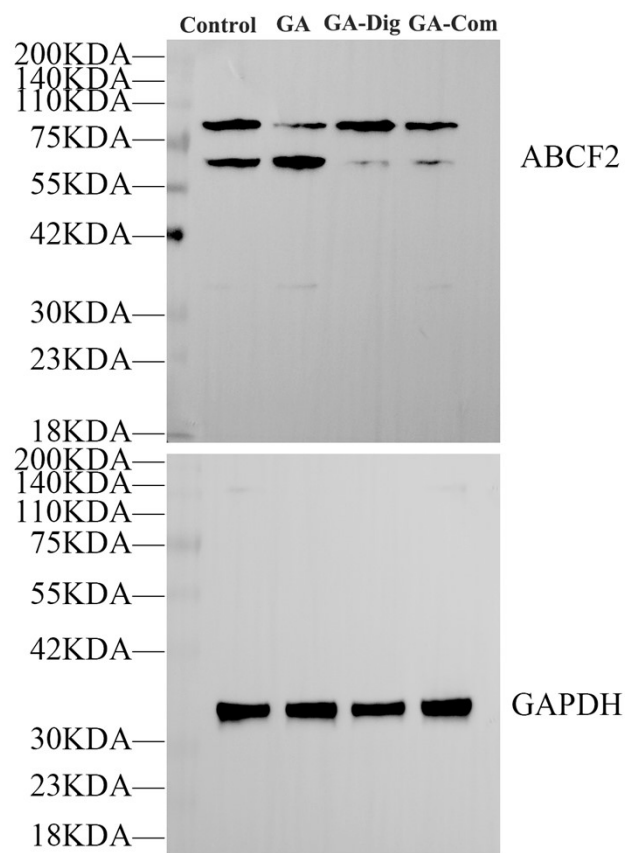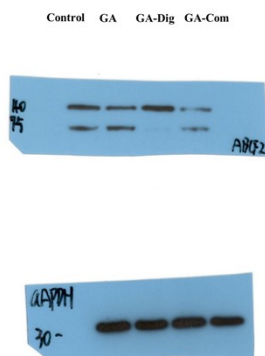

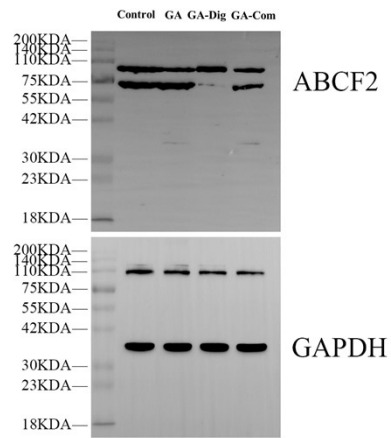

**Fig. S1** Raw images of western blot.

Supplement: d2fo00469k1.pdf [file d2fo00469k1.pdf]
